# Supplementary material for: Fluorine-free superhydrophobic/hydrophobic polybenzoxazine/TiO2 films with excellent thermal stability and reversible wettability
Source: Royal Society of Chemistry journal article supplement (doi:10.1039/c5ra06410d), 2015-01-01
Supplement: c5ra06410d1.pdf [file c5ra06410d1.pdf]

## Fluorine-free Superhydrophobic/Hydrophobic Polybenzoxazine/TiO<sub>2</sub> Films with Excellent Thermal Stability and Reversible Wettability

Wenfei Zhang, Xin Lu, Zhong Xin†, Changlu Zhou and Juan Liu

### Supplementary information

#### Chemical structure of MP-aptms and poly(MP-aptms)

To confirm the structure of MP-aptms and poly(MP-aptms), a qualitative infrared analysis was undertaken as shown in Figure S1. The absorption peak corresponding to asymmetric stretching vibration of C-O-C at 1227 cm<sup>-1</sup> and bending vibration of C-H out plane at 935 cm<sup>-1</sup> disappears after curing,<sup>1</sup> which confirm the opening of the oxazine ring and the occurrence of polymerization reaction. In the meantime, the disappearance of asymmetric stretching vibration of Si-O-C at 1086 cm<sup>-1</sup> and the emergence of a peak at 1113 cm<sup>-1</sup> reveal the formation of Si-O-Si. Hence, the ring-opening reaction of MP-aptms and the cross-linkage of Si-O-Si occurred simultaneously by curing at 200 °C for 1h (Scheme S1). Cross-linking structures were formed in poly(MP-aptms).

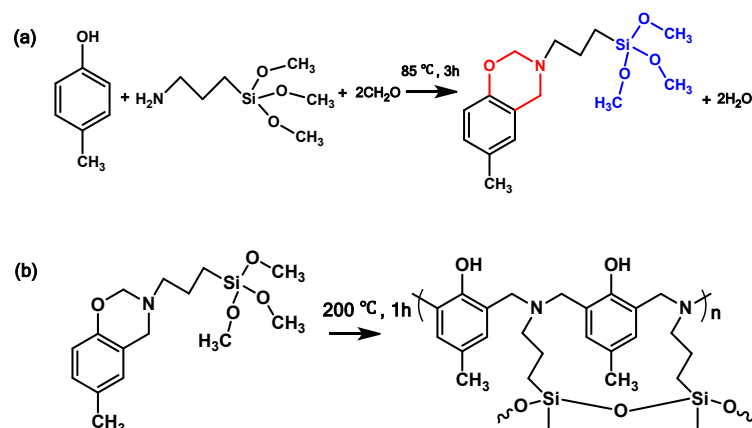

Scheme S1 Synthesis of a) MP-aptms and b) poly(MP-aptms)

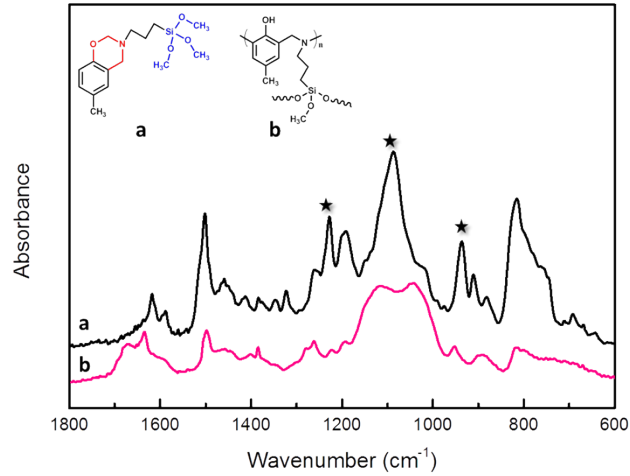

Figure S1 FTIR spectra of a) MP-aptms and b) poly(MP-aptms)

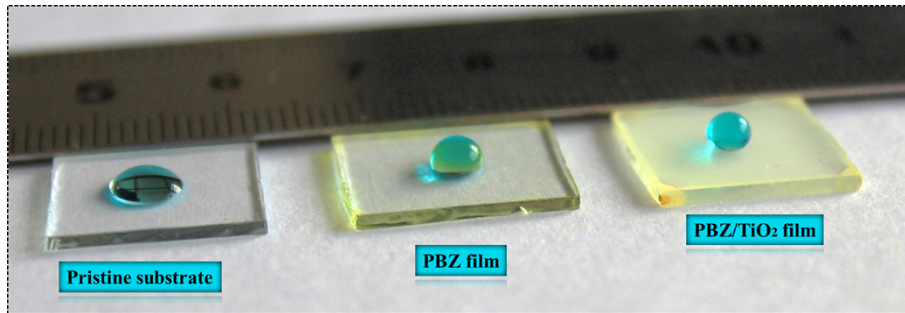

Figure S2 Photograph of water droplet on pristine glass substrated, PBZ film and PBZ/TiO<sub>2</sub> film. Water droplet was dyed with methylene blue.

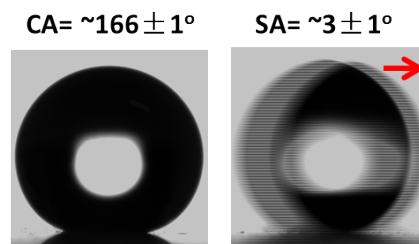

Figure S3 Water CA (left) and SA (right) image of PBZT11 surface. The rolling direction of water droplet on PBZT11 surface is indicated by red arrow

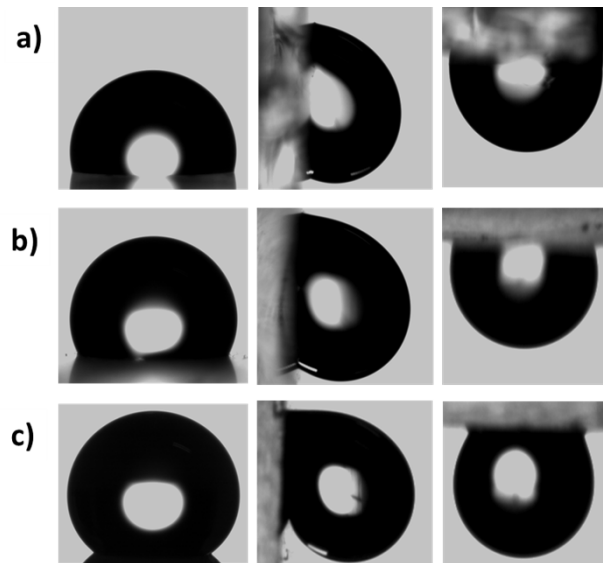

Figure S4 Water CA images of a) PBZ, b) PBZT5 and c) PBZT40. The left, middle and right images are photographed when the base was tilted for 0°, 90° and 180° respectively

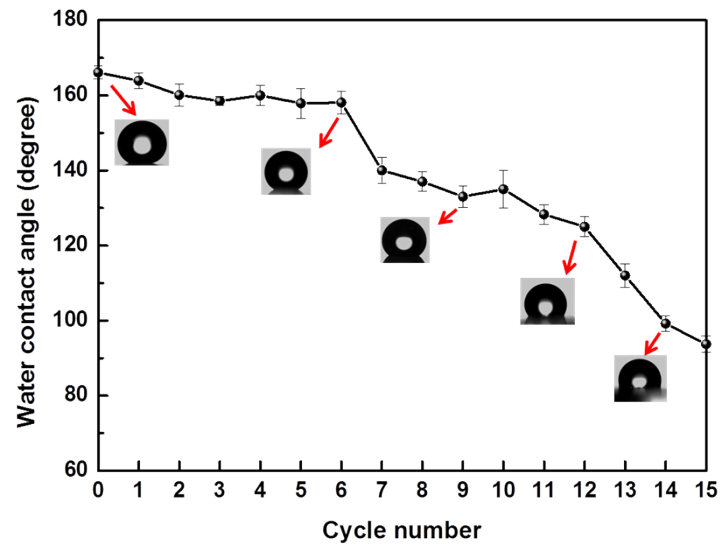

Figure S5 Variations in water CA of PBZT11 after sandpaper abrasion test

### Reference

- 1 J. Liu, X. Lu, Z. Xin and C. Zhou, *Langmuir*, 2013, **29**, 411-416.
